# Supplementary material for: In vitro Antibacterial Activities, DPPH Radical Scavenging, and Molecular Modeling of Isolated Compounds from the Bark of Grewia ferruginea
Source: Research Square preprint supplement (doi:10.21203/rs.3.rs-3485049/v1), 2023-10-28
Supplement: Supplementary file 1 [file 848dac027fc2e235fb0589d2.docx]

**Supporting Information**

**In *Vitro* Antibacterial Activities, DPPH Radical Scavenging, and Molecular Modeling of Isolated Compounds from the Bark of *Grewia ferruginea***

Tolessa Duguma1, Yadessa Melaku1, Daniel Rentsch2, Urgessa Ensermu3, Milkyas Endale1, Aman Dekebo1, Lemi Guta4, Hunduma Dinka3

1Department of Applied Chemistry, Adama Science and Technology University, Adama, Ethiopia

2 Laboratory for Functional Polymers, Empa, Swiss Federal Laboratories for Materials Science and Technology, Switzerland

3Department of Applied Biology, Adama Science and Technology University, Adama, Ethiopia

4Department of Applied Mathematics, Adama Science and Technology University, Adama, Ethiopia

The total ion chromatogram and the NMR spectral data used to characterize the structure of isolated compounds are shown as Figure S1-S32 and the table contains the essential oil components, the summary of NMR spectral data of compound **36** and **39,** andmolecular docking resultsare given as Table S-1 to S-5


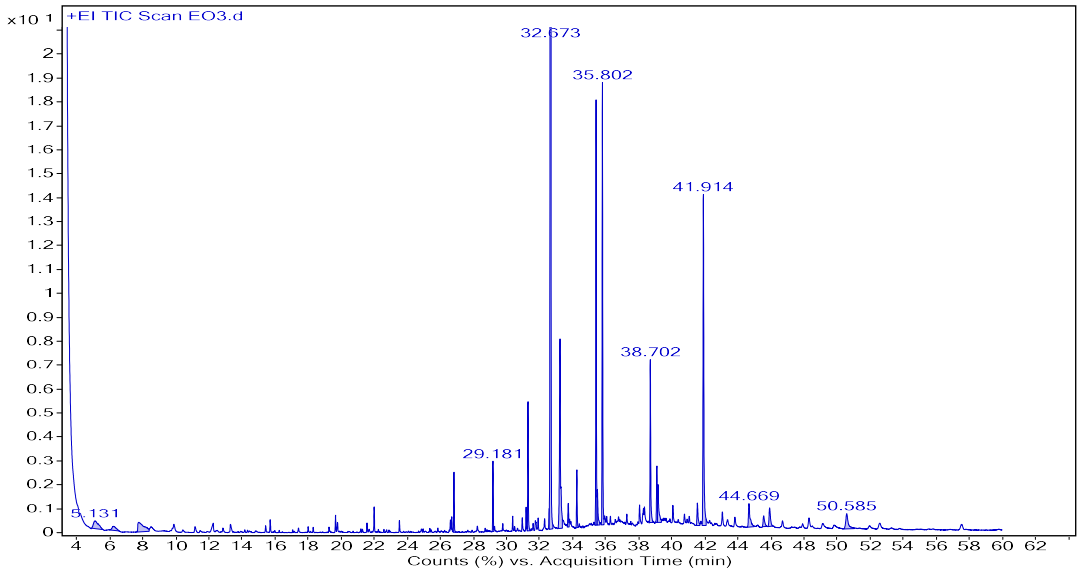


**Figure S1:** Total ion chromatogram (TIC) of essential oil from dried *G. ferruginea* bark

**Table S-1.** List of 48 essential oil components from dried *G. ferruginea* bark analyzed using GC-MS (Only numbered compounds were characterized)

| Comp. | Name | Formula | RT | RI | | Area | Peak Area (%) |
| --- | --- | --- | --- | --- | --- | --- | --- |
|  |  |
| Calculated | Reported |
|  | toluene | C7H8 | 5.131 | 758.1 | 758 | 468399 | 1.08 |
|  | hexanol-4-D2 | C6H12D2O | 6.221 | 799.7 |  | 196606 | 0.45 |
| 1 | sulfinylbis(methane) | C2H6OS | 7.772 | 844.7 | 829.2 | 690476 | 1.59 |
|  | m - xylene and p - xylene | C8H10 | 8.478 | 865.2 | 865 | 111646 | 0.26 |
|  | hexanol-6-D3 | C6H11D3O | 9.884 | 906.4 |  | 157460 | 0.36 |
| 2 | pentanoic acid | C5H10O2 | 12.261 | 980.8 | 938 | 167203 | 0.38 |
| 3 | 2(5H)-furanone, 3-methyl-5-methylene- | C6H6O2 | 13.304 | 1015 |  | 122367 | 0.28 |
| 4 | nonanal | C9H18O | 15.706 | 1099.6 | 1099 | 103555 | 0.24 |
| 5 | (2E)-2-decenal | C10H18O | 19.66 | 1256.2 | 1256 | 118264 | 0.27 |
| 6 | 1-undecen-10-al | C11H20O | 21.995 | 1357.4 | 1313 | 192705 | 0.44 |
| 7 | 1-dodecanol | C12H26O | 26.691 | 1582.4 | 1487 | 104900 | 0.24 |
| 8 | 1,2-benzenedicarboxylic acid, diethyl ester | C12H14O4 | 26.825 | 1589.5 | 1589.2 | 415251 | 0.95 |
| 9 | myristic acid, methyl ester | C15H30O2 | 29.181 | 1714.4 | 1714 | 464009 | 1.07 |
| 10 | (E)-2-nonadecene | C19H38 | 30.375 | 1781.1 | 1906 | 101333 | 0.23 |
| 11 | methyl 13-methyltetradecanoate | C16H32O2 | 30.956 | 1814.1 | 1779.1 | 116412 | 0.27 |
| 12 | neophytadiene | C20H38 | 31.189 | 1827.5 | 1827 | 164888 | 0.38 |
| 13 | 6,10,14-trimethyl-2-pentadecanone | C18H36O | 31.303 | 1834 | 1835 | 929497 | 2.14 |
| 14 | phthalic acid, butyl undecyl ester | C23H36O4 | 31.75 | 1860.3 |  | 127938 | 0.29 |
| 15 | methyl palmitate | C17H34O2 | 32.673 | 1914.7 | 1915 | 19658935 | 45.17 |
| 16 | palmitic acid | C16H32O2 | 33.239 | 1949.7 | 1950 | 2222527 | 5.11 |
| 17 | ethyl palmitate | C18H36O2 | 33.737 | 1980.4 | 1980 | 226847 | 0.52 |
| 18 | methyl heptadecanoate | C18H36O2 | 34.256 | 2012.9 | 2013 | 423655 | 0.97 |
| 19 | methyl 13-octadecenoate | C19H36O2 | 35.418 | 2087.7 | 2098 | 3072885 | 7.06 |
| **Table S-1.** Continued | | | | | | | |
| 20 | methyl (*Z*)-9-octadecenoate | C19H36O2 | 35.501 | 2092.8 | 2095 | 400352 | 0.92 |
| 21 | methyl stearate | C19H38O2 | 35.802 | 2112.7 | 2113 | 3283989 | 7.55 |
| 22 | methyl 16-acetylhydroxypalmitate | C19H36O4 | 35.942 | 2122.1 |  | 112366 | 0.26 |
|  | linoleic acid | C18H32O2 | 38.054 |  |  | 195288 | 0.45 |
| 23 | (*E*)-9-octadecenoic acid | C18H34O2 | 38.287 | 2283.3 |  | 166743 | 0.38 |
|  | linoleic acid | C18H32O2 | 38.35 |  |  | 192359 | 0.44 |
| 24 | methyl eicosanoate | C21H42O2 | 38.702 | 2312.9 | 2313 | 1311757 | 3.01 |
| 25 | 4,8,12,16-tetramethylheptadecan-4-olide | C21H40O2 | 39.097 | 2341 | 2364.2 | 477525 | 1.10 |
| 26 | (*Z*)-9-pentadecenol | C15H30O | 39.169 | 2346.7 |  | 515161 | 1.18 |
| 27 | methyl 18-methylicosanoate | C22H44O2 | 40.067 | 2411.6 | 2401.1 | 158363 | 0.36 |
| 28 | methyl docosanoate | C23H46O2 | 41.551 | 2511 | 2511 | 291599 | 0.67 |
| 29 | diisooctylphthalate | C24H38O4 | 41.914 | 2532.4 | 2525 | 3325247 | 7.64 |
|  | 11,13-dimethyl-12-tetradecen-1-ol acetate | C18H34O2 | 43.061 |  |  | 169443 | 0.39 |
|  | 1,3-dioxolane, 4-ethyl-5-octyl-2,2-bis(trifluoromethyl)-, trans- | C15H24F6O2 | 43.372 |  |  | 119854 | 0.28 |
|  | 11,13-dimethyl-12-tetradecen-1-ol acetate | C18H34O2 | 43.818 |  |  | 129369 | 0.30 |
|  | stearyl alcohol | C18H38O | 44.669 |  |  | 469285 | 1.08 |
| 30 | methyl tetracosanoate | C25H50O2 | 45.557 | 2712.3 | 2712 | 197657 | 0.45 |
|  | stearyl alcohol | C18H38O | 45.92 |  |  | 318451 | 0.73 |
|  | tridecanal | C13H26O | 46.703 |  |  | 126066 | 0.29 |
| 31 | 5,9,13,17-tetramethyl 4,8,12,16-octadecatetraenoic acid | C22H36O2 | 48.296 | 2811.1 |  | 189473 | 0.44 |
|  | 1,3-dioxolane, 4-ethyl-5-octyl-2,2-bis(trifluoromethyl)-, trans- | C15H24F6O2 | 49.127 |  |  | 126913 | 0.29 |
| 32 | ginsenol | C15H26O | 49.832 | 2855.9 |  | 113101 | 0.26 |
|  | 1,3-dioxolane, 4-ethyl-5-octyl-2,2-bis(trifluoromethyl)-, trans | C15H24F6O2 | 50.585 |  |  | 453782 | 1.04 |
|  | 1,3-dioxolane, 4-ethyl-5-octyl-2,2-bis(trifluoromethyl)-, trans- | C15H24F6O2 | 52.577 |  |  | 140392 | 0.32 |
|  | arsenous acid, tris(trimethylsilyl) ester | C9H27AsO3Si3 | 57.532 |  |  | 182182 | 0.42 |

**Figure S2**: 1H NMR spectra of compound **33**

**Figure S3**. 13C NMR spectrum of compound **33**

**Figure S4.** 13C DEPT-135 NMR spectrum of compound **33**


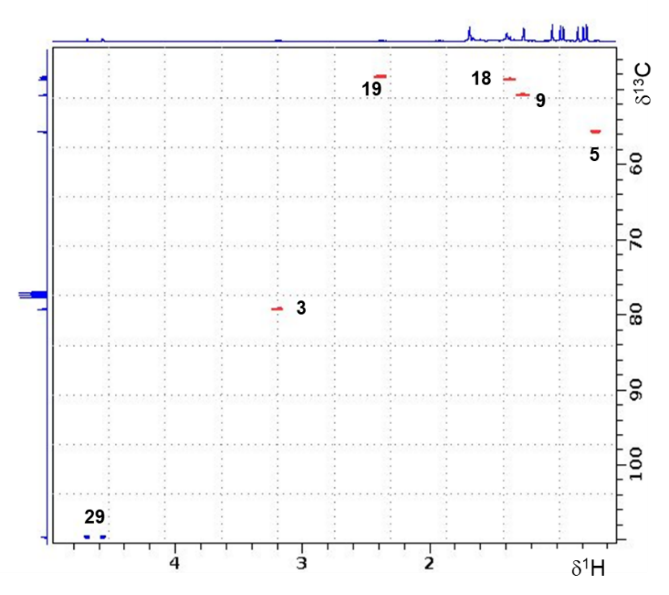

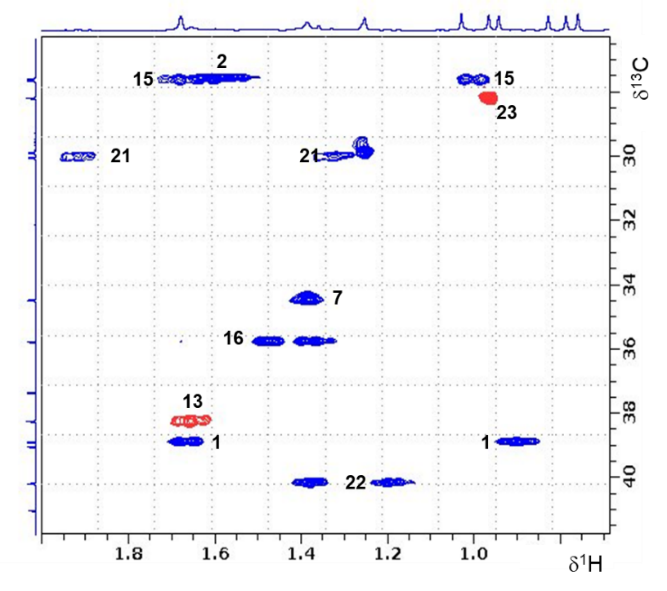

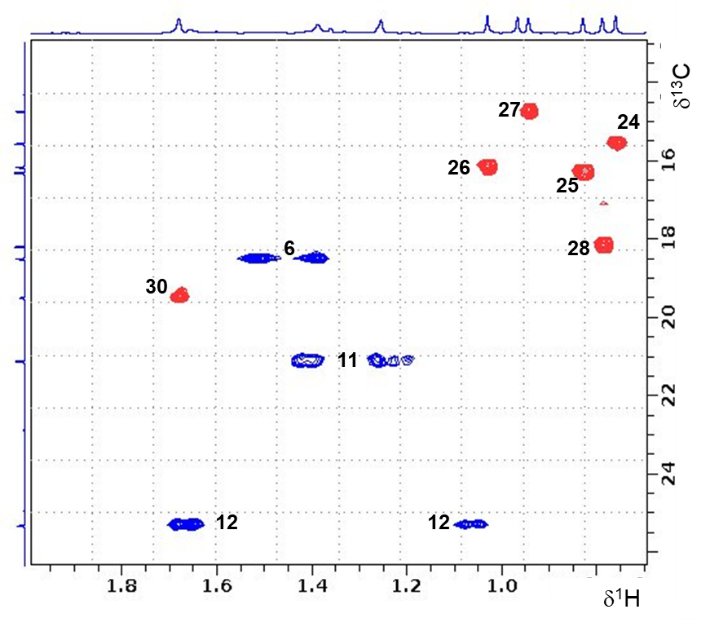


**Figure S5.** Expanded regions of 1H-13C HSQC NMR spectrum with assignments of resonances of compound **33**


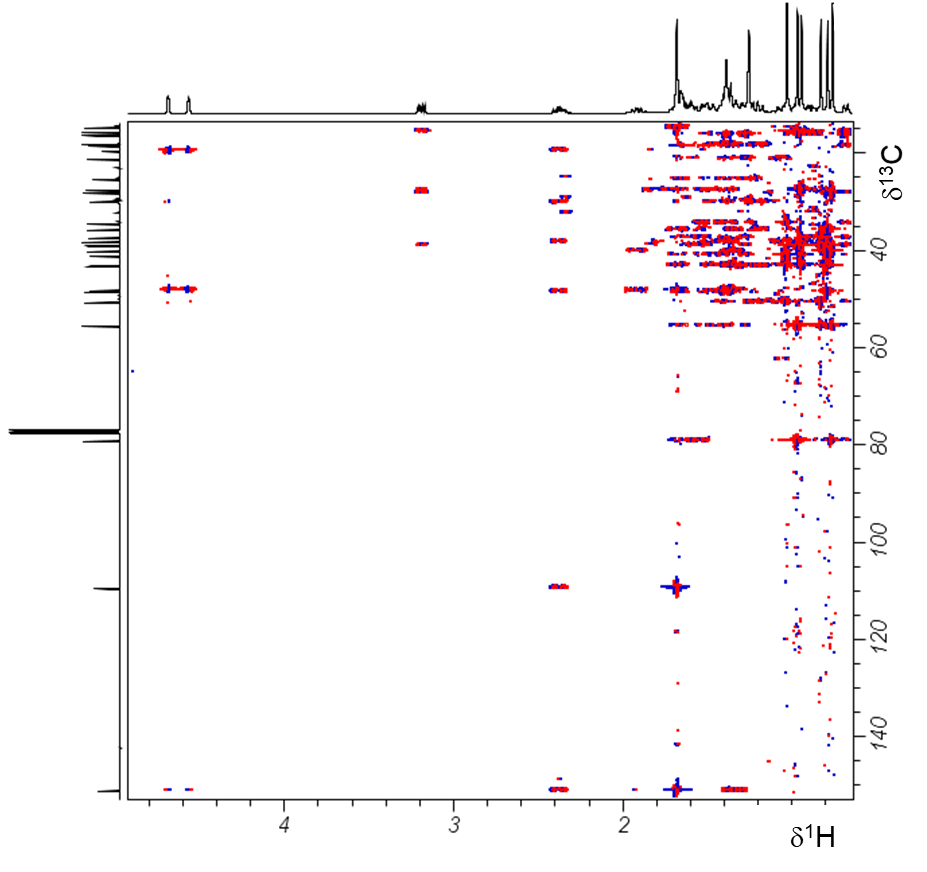

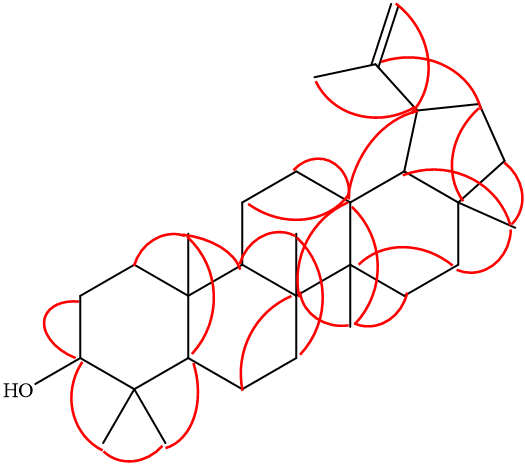


**Figure S6.**  1H-13C HMBC NMR spectrum and crucial correlations identified for assignment of chemical structure of compound **33**


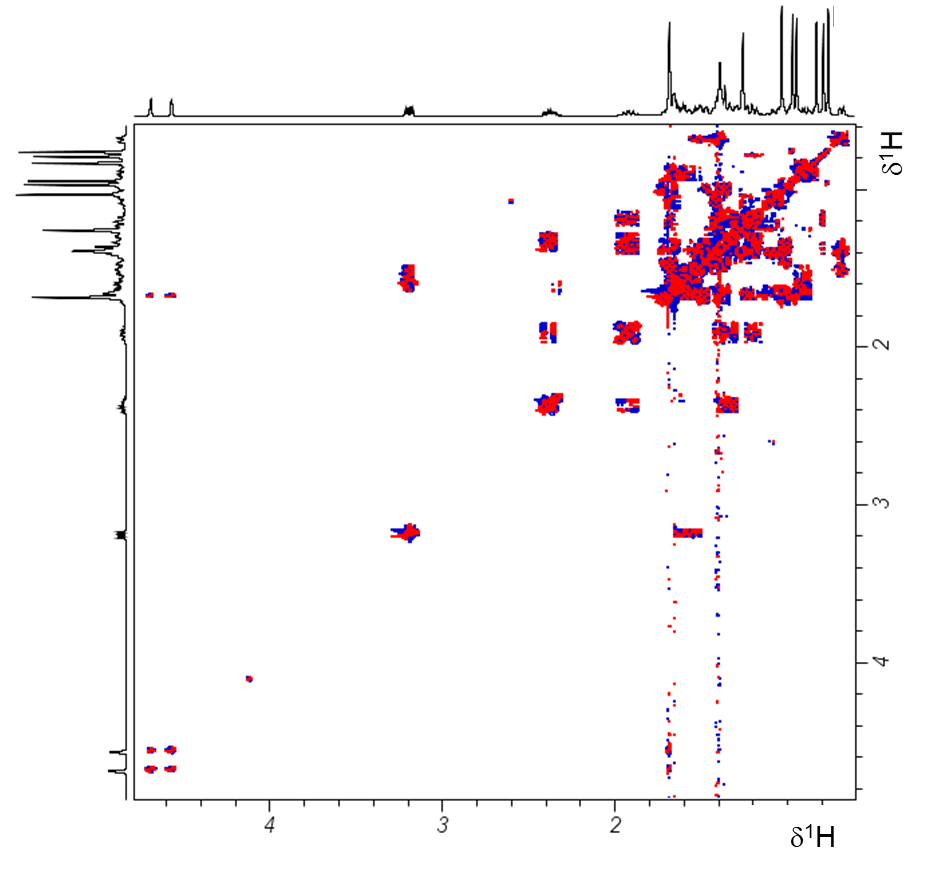


**Figure S7.**  1H-1H DQF-COSY NMR spectrum of compound **33**

**
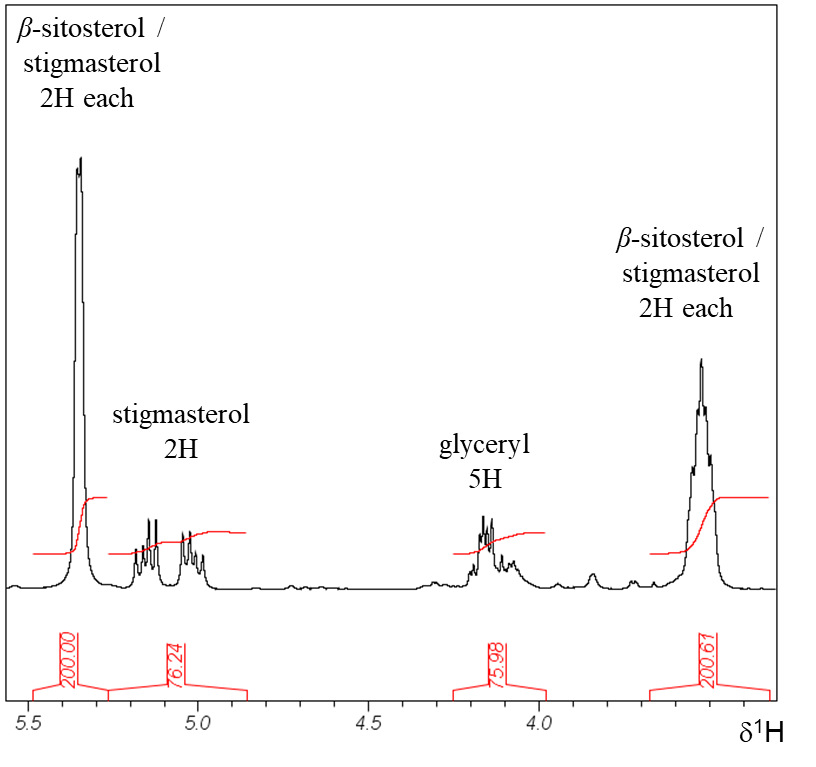
**

**Figure S8.**  1H NMR spectrum and enlarged region with integrals to determine relative amounts of compound **34, 35**, and glyceryl tristearate

**Figure S9.** 13C NMR spectrum of compound **34, 35**, and glyceryl tristearate)

**Figure S10.** 13C DEPT-135 NMR spectrum of compound **34, 35**, and glyceryl tristearate


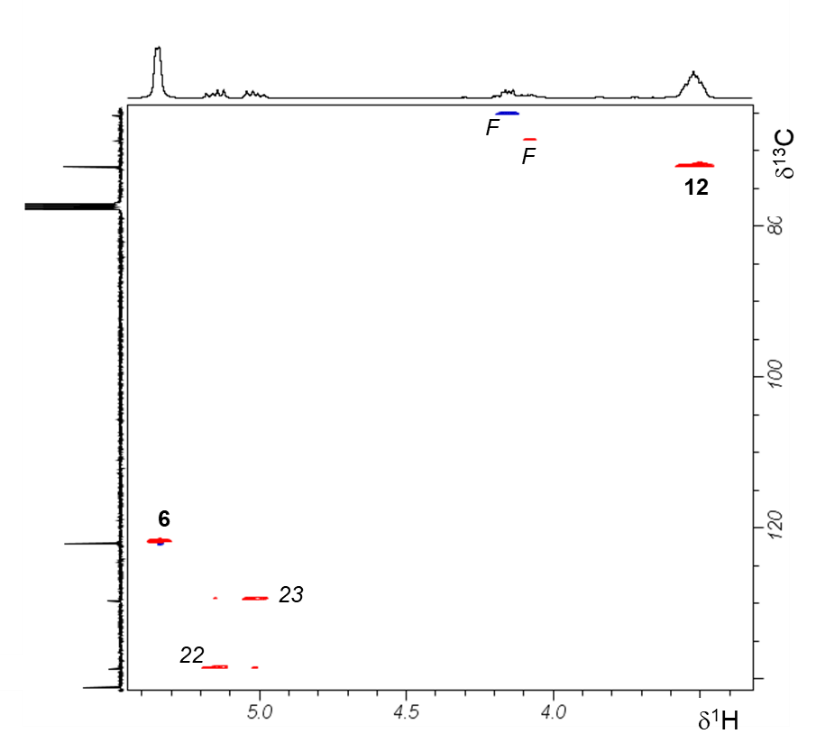

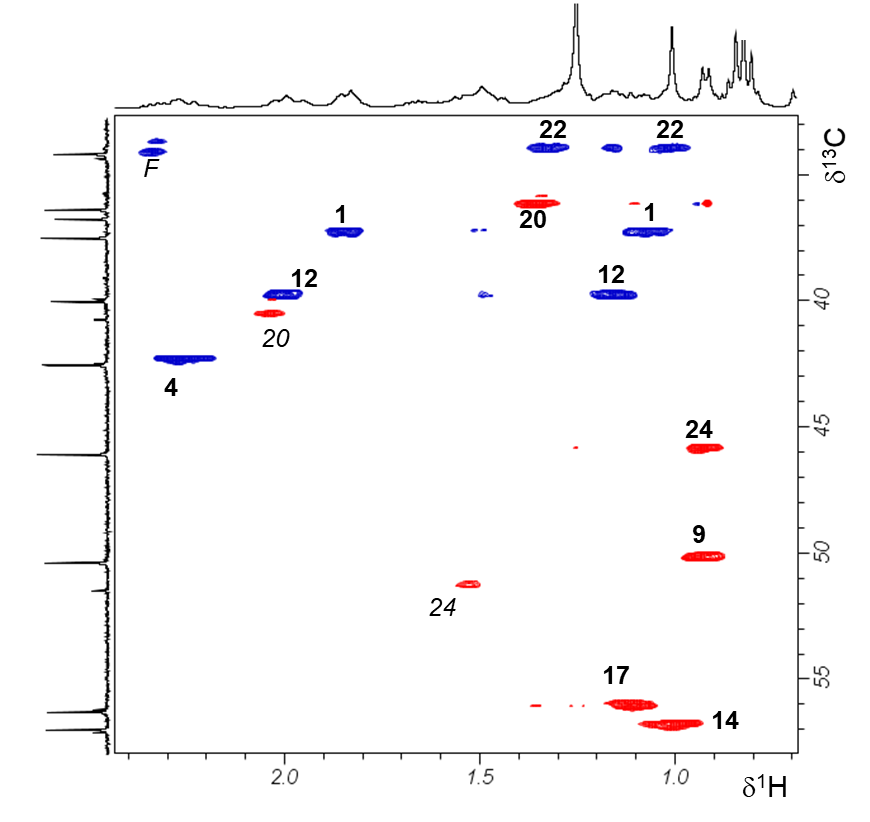


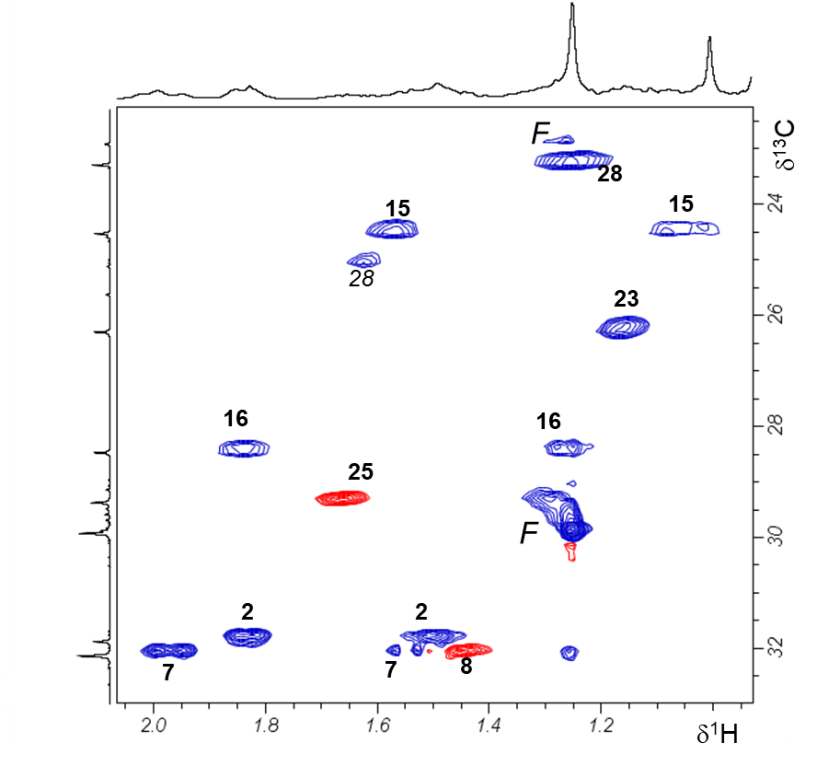

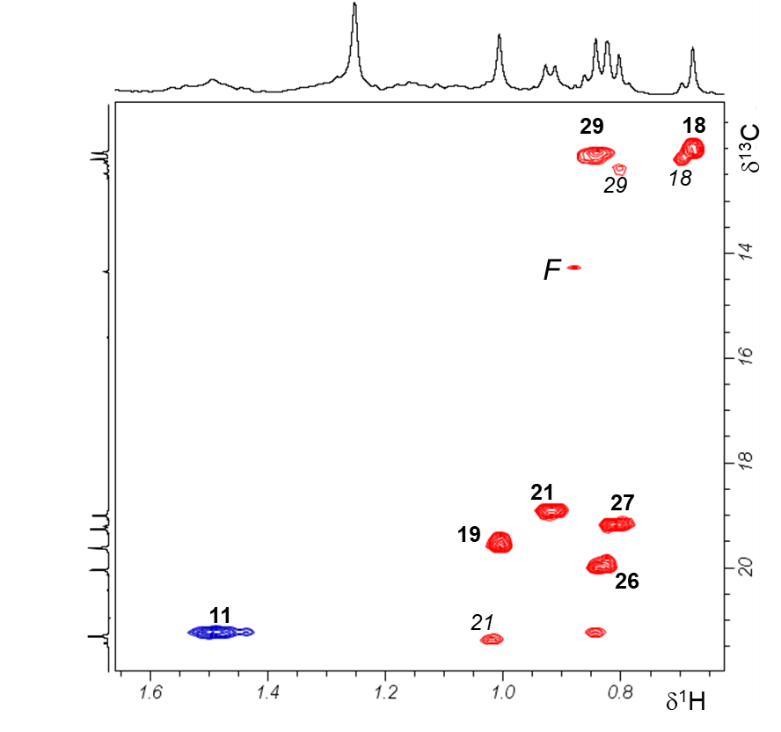


Figure S11. Expanded regions of 1H-13C HSQC NMR spectrum with assignments of resonances of compound **34** (in bold), compound **35** (in *italic*), and glyceryl tristearate = *F*)


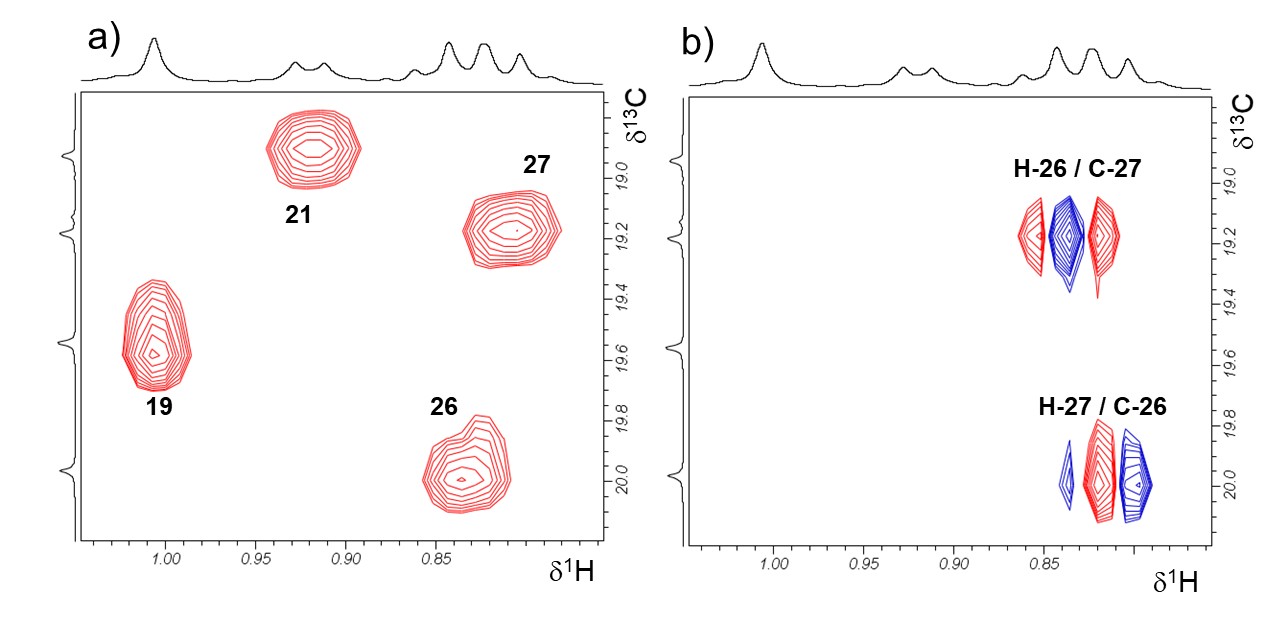
 **Figure S12.**  Expanded regions of 1H-13C HSQC (a) and HMBC (b) NMR spectra with assignments of resonances of compound **34** with crucial HMBC correlations of H-26 to C-27 and H-27 to C-26 used for unambiguous assignment of resonances


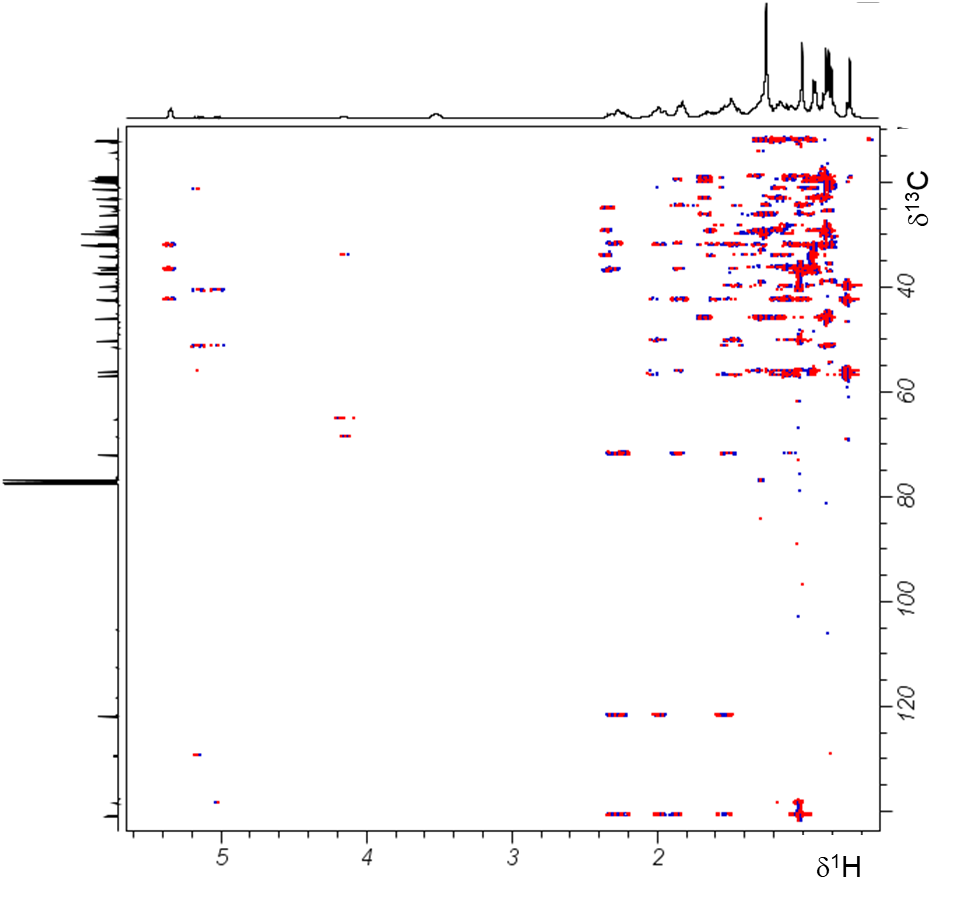

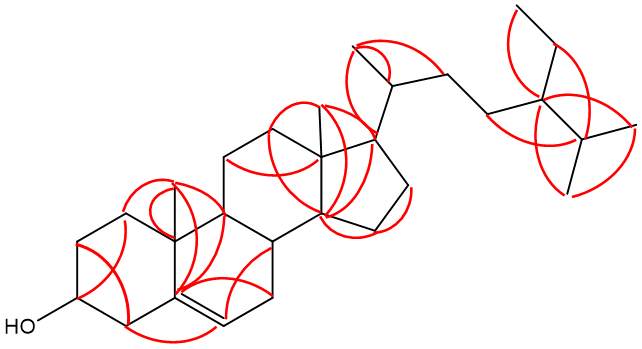


**Figure 13.** 1H-13C HMBC NMR spectrum and crucial correlations identified for assignment of chemical structure of compound **34**


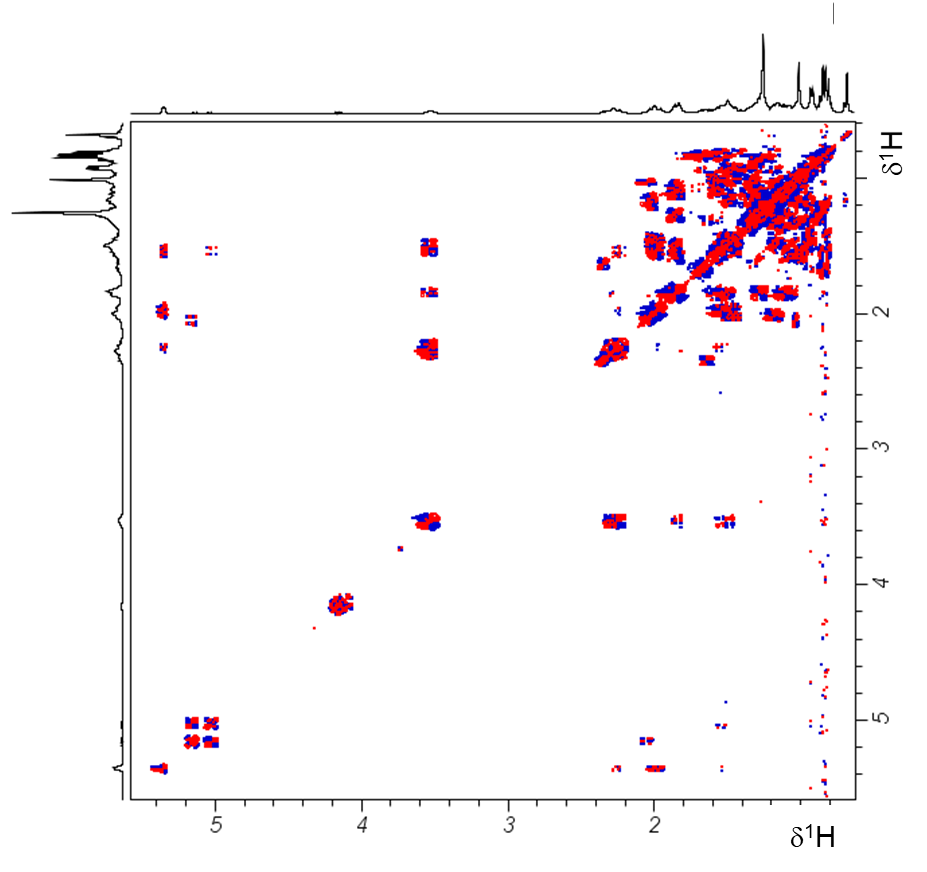


**Figure S14.**  1H-1H DQF-COSY NMR spectrum of compound **34, 35**, and glyceryl tristearate

Table S-2.1H-NMR (400.2 MHz) and13C-NMR (100.6 MHz) spectral data of compound **35** and NMR data reported for stigmasterol

| C- | Compound **35** (in CDCl3) | | | *δ*13C of stigmasterol | |
| --- | --- | --- | --- | --- | --- |
| *δ*1H | *δ*13C | HMBC | [30] | [31] |
| 1 |  | 37.4 |  | 37.2 | 37.6 |
| 2 |  | 31,8 |  | 31.6 | 32.1 |
| 3 |  | 72.0 |  | 71.8 | 72.1 |
| 4 |  | 42.4 |  | 42.2 | 42.4 |
| 5 |  | 140.9 |  | 140.7 | 141.1 |
| 6 |  | 121.9 |  | 121.7 | 121.8 |
| 7 |  | 32.0 |  | 31.9 | 31.8 |
| 8 |  | 32.0 |  | 31.9 | 31.8 |
| 9 |  | 50.3 |  | 50.1 | 50.2 |
| 10 |  | 36.6 |  | 36.5 | 36.6 |
| 11 |  | 21.2 |  | 21.0 | 21.5 |
| 12 | 2.01 & 1.16 (m, 2H) | 39.8 |  | 39.7 | 39.9 |
| 13 |  | 42.4 |  | 42.3 | 42.4 |
| 14 | 1.00 (m, 1H) | 57.0 |  | 56.8 | 56.8 |
| 15 | 1.57 &1.04 (m, 2H) | 24.5 |  | 24.4 | 24.4 |
| 16 |  | 29.1 |  | 28.9 | 29.3 |
| 17 | 1.10 (m, 1H) | 56.1 |  | 56.0 | 56.2 |
| 18 | 0.69 (s, 3H) | 12.2 |  | 11.8 | 12.0 |
| 19 | 0.80 (s, 3H) | 19.1 |  | 19.1 | 18.9 |
| 20 | 2.03 (m, 1H) | 40.6 |  | 40.5 | 40.6 |
| 21 | 1.01 (3H) | 21.4 | H-17, 20, 22 | 21.5 | 21.7 |
| 22 | 5.15 (dd, 2H) | 138.3 |  | 138.3 | 138.7 |
| 23 | 5.01 (dd, 2H) | 129.4 |  | 129.3 | 129.6 |
| 24 | 1.53 (m, 1H) | 51.4 |  | 51.2 | 46.1 |
| 25 |  | 36.3 |  | 36.1 | 29.6 |
| 26 |  | 20.0 |  | 19.8 | 20.2 |
| 27 |  | 19.1 |  | 18.9 | 19.8 |
| 28 |  | 25.5 |  | 25.4 | 25.4 |
| 29 | 0.80 (3H) | 12.4 |  | 12.0 | 12.1 |

**Figure S15.** 1H NMR spectrum of compound **36**

**Figure S16.** 13C NMR spectrum of compound **36**

**Figure S17.** 13C DEPT-135 NMR spectrum of compound **36**


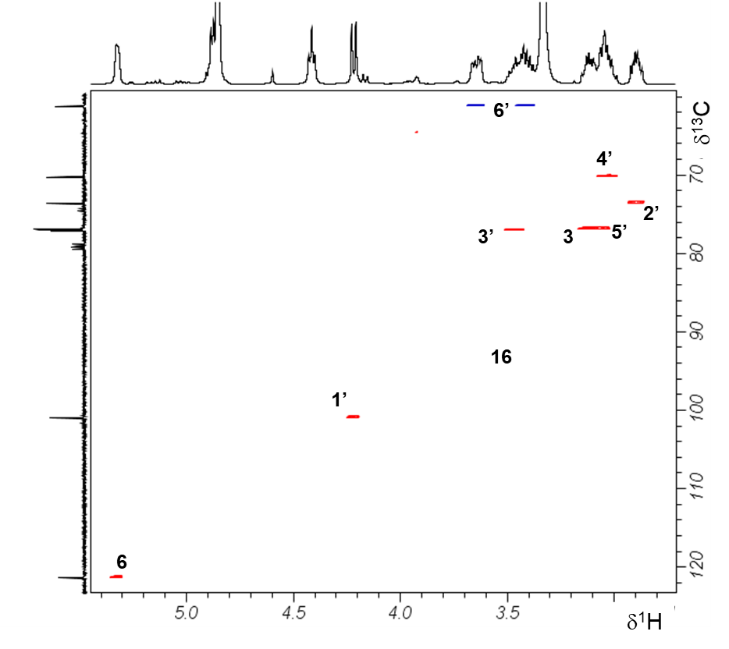

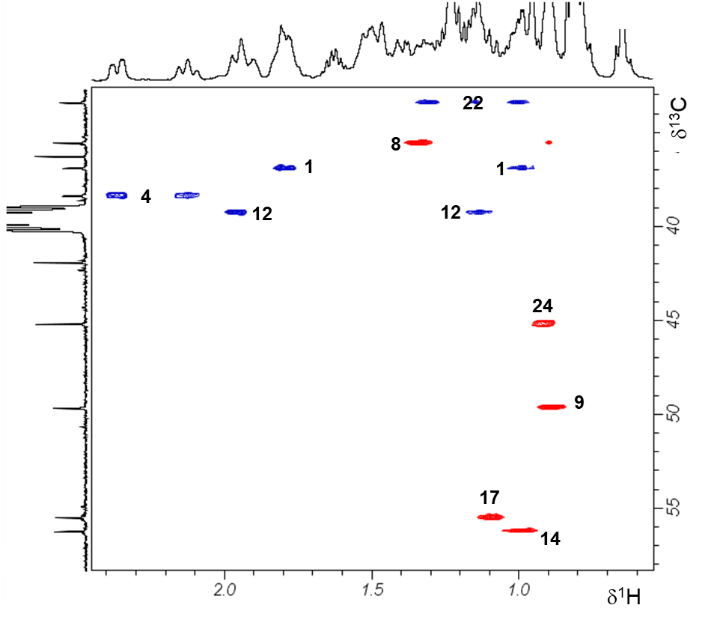


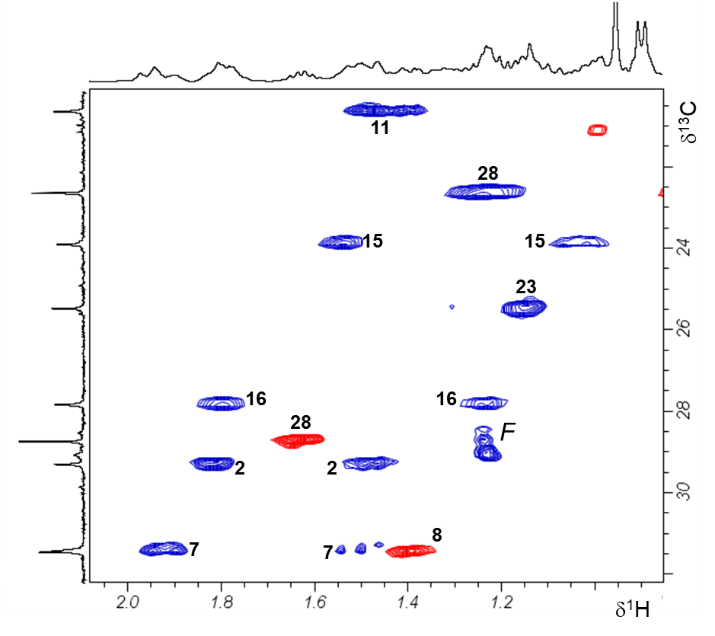

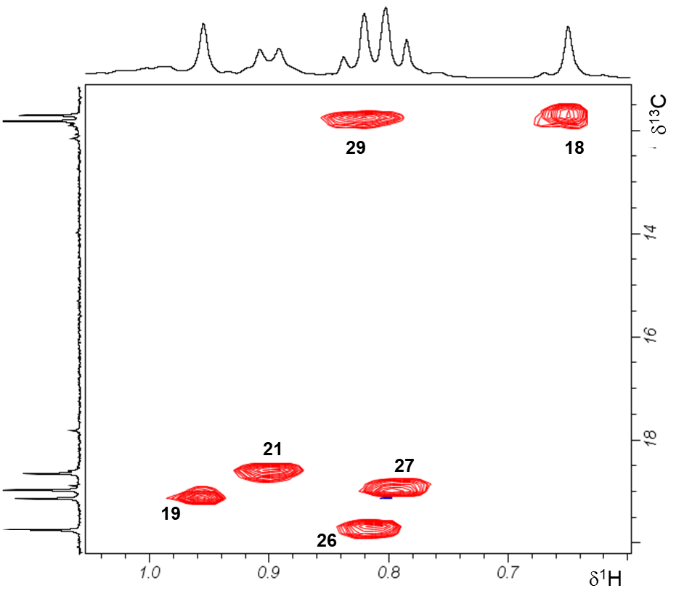


**Figure S18.** Expanded regions of 1H-13C HSQC NMR spectrum with assignments of resonances of compound **36**


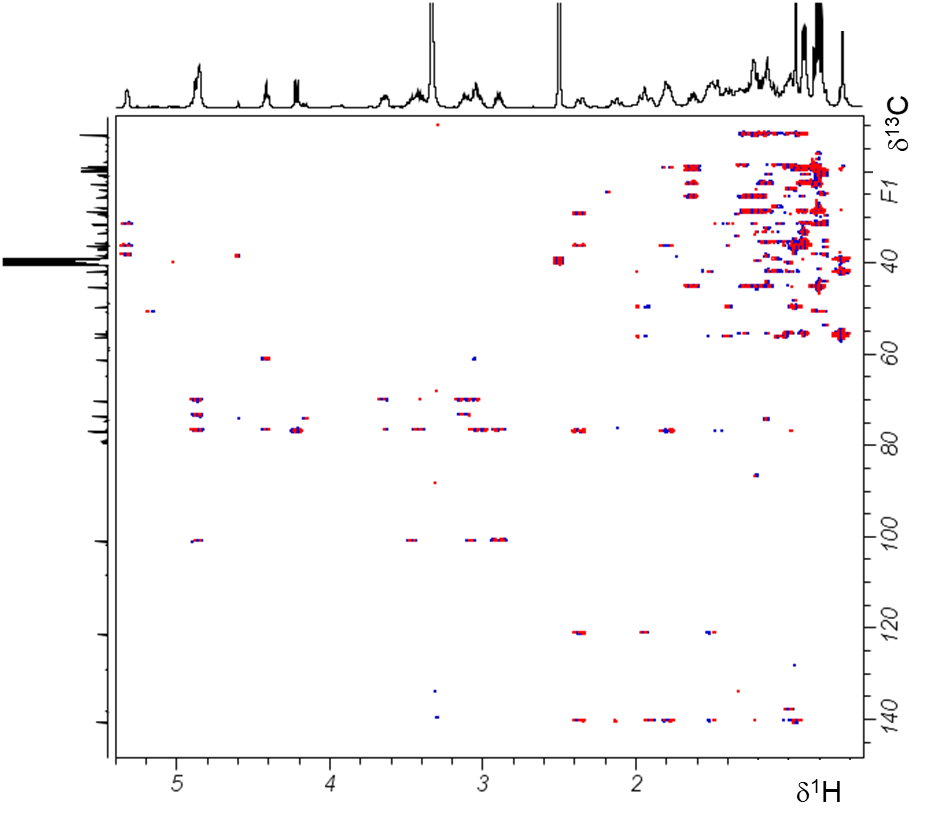

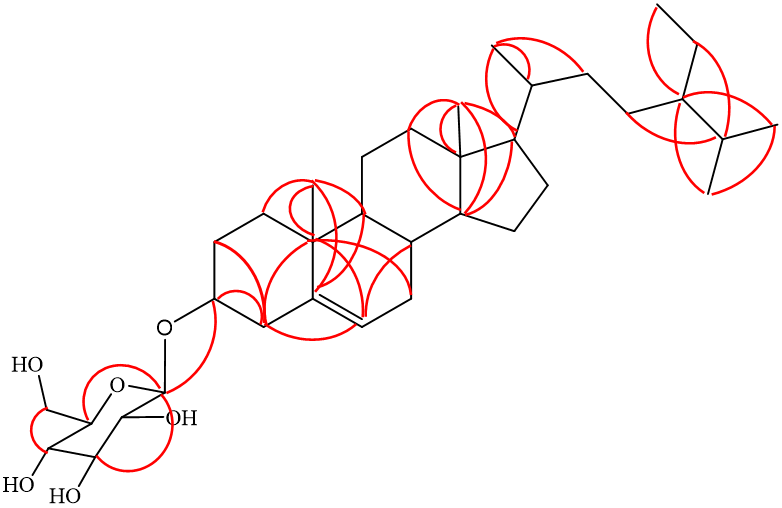


**Figure S19.** 1H-13C HMBC NMR spectrum and crucial correlations identified for assignment of chemical structure of compound **36**


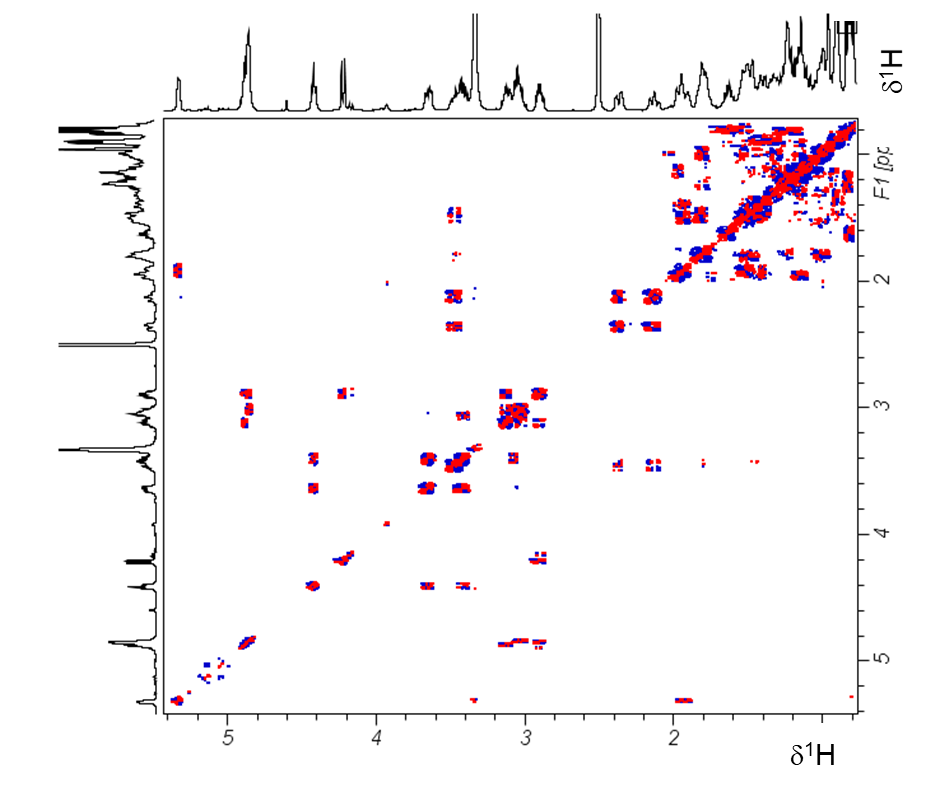


**Figure S20.** 1H-1H DQF-COSY NMR spectrum of compound **36**

**Figure S21.** 1H NMR spectrum of compound **37** and **38** and expanded region used to calculate their percentage.

**Figure S22.** 13C NMR spectrum of compound **37** and **38**

**Figure S23.** 13C DEPT-135 NMR spectrum of compound **37** and **38**


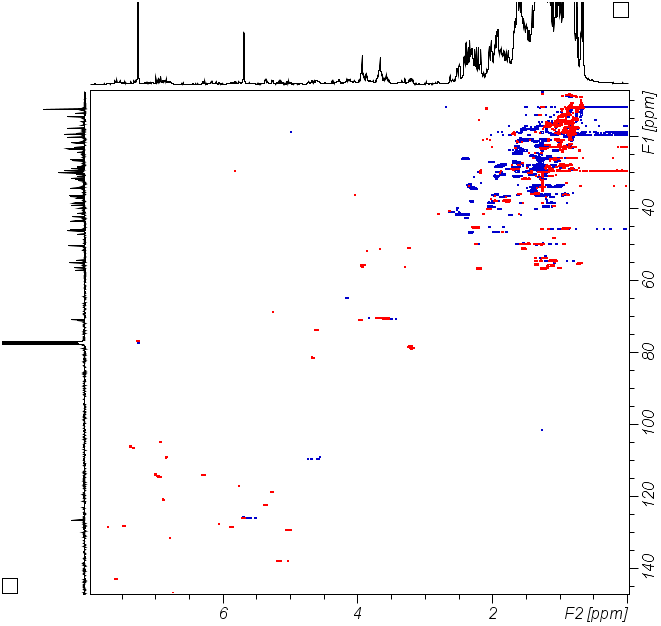


**Figure S24**. Expanded regions of 1H-13C HSQC NMR spectrum with assignments of resonances of compound **37** and **38**


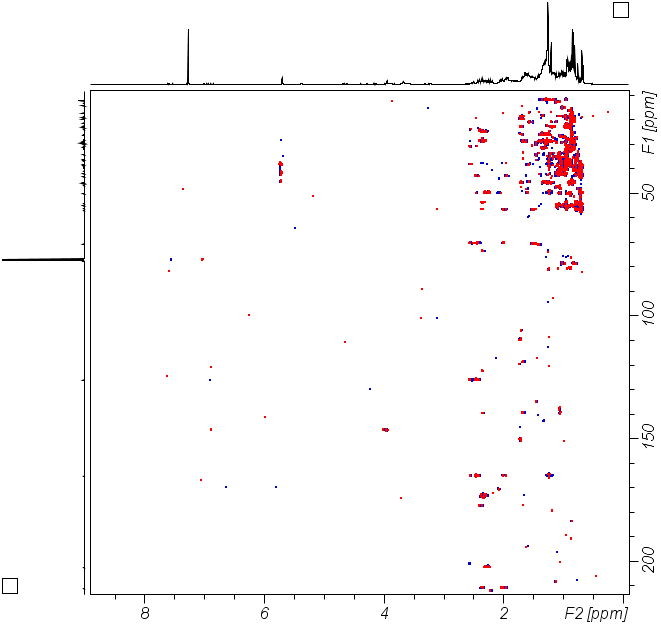


**Figure S25**. 1H-13C HMBC NMR spectrum of **37** and **38**


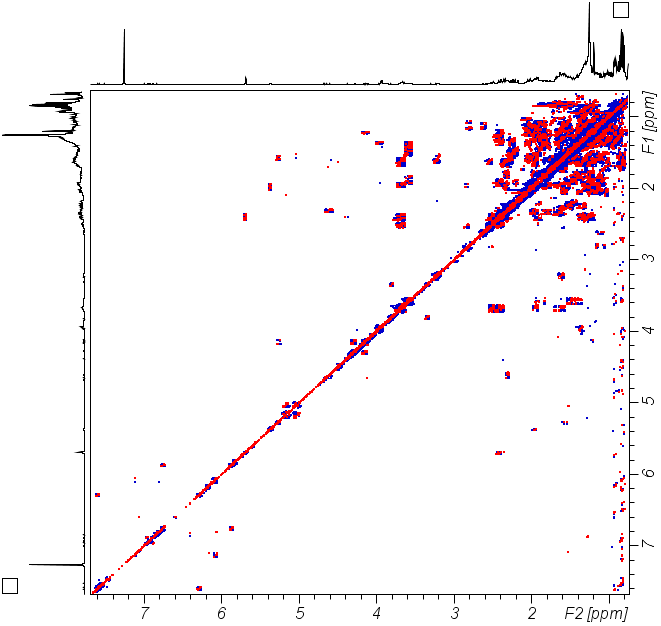


**Figure S26**. 1H-1H DQF-COSY NMR spectrum of **37** and **38**

Table S-3**.** 1H-NMR (400.2 MHz, DMSO-d6) and13C-NMR (100.6 MHz) spectral data of compound **39** and NMR data reported for catechin

| C | Compound **39** | | | | Catechin [42]  *δ*13C/ DMSO-d6 |
| --- | --- | --- | --- | --- | --- |
| *δ*1H | *δ*13C | 1H-1H COSY | 1H-13C HMBC |
| 1 |  | - |  |  | - |
| 2 | 4.46 (d, *J*=7.6 Hz, 1H) | 81.3 | H-3 | H-4, 2’ | 81.1 |
| 3 | 3.81 (m, 1H) | 66.6 | H-4 | H-2, 4 | 66.5 |
| 4 | 2.34 (dd, *J*= 15.9, 5.1 Hz, 1H)  2.64 (dd, *J*= 16.0, 8.0 Hz, 1H) | 28.2 | H-3 | H-2 | 28.0 |
| 5 | - | 155.6 |  | H-4, 8 | 155.5 |
| 6 | 5.68 (d, *J*= 2.2 Hz, 1H) | 94.0 |  | H-8 | 94.1 |
| 7 | - | 156.6 |  |  | 156.6 |
| 8 | 5.91 (d, 2.2 Hz, 1H) | 95.5 |  |  | 95.4 |
| 9 | - | 156.8 |  |  | 156.4 |
| 10 | - | 99.2 |  | H-4, 6, 8 | 99.3 |
| 1’ | - | 130.7 |  | H-5’, H-2 | 130.8 |
| 2’ | 6.69 (d, 2.0 Hz, 1H) | 115.4 |  | H-6’, 2 | 114.7 |
| 3’ | - | 145.6 |  | H-2’ | 145.0 |
| 4' | - | 145.6 |  | H-5’ | 145.0 |
| 5’ | 6.67 (d, *J*= 8.0 Hz, 1H) | 115.9 | H-6’ |  | 115.3 |
| 6’ | 6.56 (dd, *J*= 8.0, 2.0 Hz, 1H) | 118.5 | H-5’ | H-2’ | 118.7 |

**Figure S27.** 1H NMR spectrum of compound **39**

**Figure S28.** 13C NMR spectrum of compound **39**

**Figure S29.** 13C DEPT-135 NMR spectrum of compound **39**

**Figure S30**. 1H-13C HSQC NMR spectrum with assignments of resonances of compound **39**

**Figure S31.** 1H-13C HMBC NMR spectrum of **39**

**Figure S32**. 1H-1H DQF-COSY NMR spectrum of **39**

| Target | Ligand | Binding affinity (Kcal/mol) | H-bonding | Hydrophobic and Electrostatic | Vaan der Waals |
| --- | --- | --- | --- | --- | --- |
| 7P2M | **33** | -6.9 | - | - | Ile-140, Arg-206, His-64, Gln-72, Ser-70, Met-166, Glu-131, Val-133, Arg-142, Thr-157 |
| **34** | -6.8 | - | Pi-sigma: Phe-196; Alkyl and Pi-alkyl: Arg-192, Leu-197, Phe-196 | Glu-193, Ser-195, His-217, Phe-216, Tyr-218 |
| **35** | -7.8 | Thr-165 | Alkyl: Ile-78, Ile-94 | Leu-98, Val-93, Val-97, Gly-119, Val-120, Asn-46, Asp-73, Glu-50, Gly-75, Arg-76, Gly-77, Pro-79 |
| **36** | -7.7 | Glu-85 | Alkyl and Pi-alkyl: Tyr-26, Leu-98, Lys-11, Val-97 | Val-118, Ser-8, Glu-86, Val-12, Gly-15 |
| **37** | -7.8 | Asp-73 | Alkyl: Ile-78, Ile-94; Pi-sigma: His-83 | Ala-90, Val-93, Pro-79, Arg-76, Arg-136, Gly-77, Thr-165, Glu-50, Ala-47, Asn-46 |
| **38** | -8.0 | Asp-73 | Alkyl: Ala-90, Ile-78, Val-93, Ile-94;Pi-sigma: His- 83 | Pro-79, Gly-77, Glu-50, Thr-165, Ala-47, Asn-46, Asp-49 |
| **39** | -7.8 | Asp-73, Arg-76 | Carbon hydrogen bond: Asn-46; Pi-anion: Glu-50; Pi-sigma: THr-165; Pi-alkyl:Ala-47 | Val-71, 43, 167, 120, Ile-78, 94, Asp-49 |
| Ciprofloxacin | -7.4 | Arg-76 | Carbon hydrogen bond: Asp-73; Halogen: Asp-73; Amide pi-stacked: Gly-77; Alkyl and pi-alkyl:Pro-79, Ile-94, Ile-78 | Arg-136, Glu-50, Thr-165, Val-120, Val-167, Val-43, Asn-46, Ala-47, |
| 5OE4 | **33** | -9.1 | - | Pi-sigma: Trp-233 | Ala-256, Pro-234, Asn-84, Phe-208, Lys-86, Phe-209, Lys-206, Pro-205, Ile-204, Val-254, Ile-257 |
| **34** | -8.8 | - | Pi-sigma: Phe-209, Trp-233; Alkyl and Pi-alkyl: Pro-205, Phe-209, Trp-233 | Val-254, Pro-234, Phe-208, Lys-206, Ile-204 |
| **35** | -9.0 | - | Pi-sigma: Phe-209, Trp-233, Alkyl and Pi-alkyl: Pro-205, Trp-233 | Val-254, Ile-204, Pro-234, Pro-236, Ser-235, Phe-208 |
| **36** | -8.4 | Arg-200, Ala-245 | - | Gly-198, Thr-20, Ala-21, Gly-27, Thr-29, Gln-28, Gly-27, Phe-246, His-24, Thr-29, His-24, Ala-21, Asp-19 |
| **37** | -8.0 | Lys-86 | Alkyl: Pro-205, Pro-234; Pi-sigma: Phe-209, Trp-234 | Ser-235, Ile-204, Ile-257, Lys-206, Phe-208 |
| **38** | -8.3 | - | Alkyl and Pi-alkyl: Lys-206, Pro-234, TRp-233 | Phe-209, Phe-208, Ser-235, Pro-236, Pro-205, Val-254, Ile-204, Ile-257 |
| **39** | -8.0 | *Gly-279, 300, Tyr-378, Glu-305, Thr-305, 164* | Carbon hydrogen and Pi-donor hydrogen bond: Pro-281, His-394; Pi-sigma and Amide pi-stacked:Ile-301, Ala-303, Gly-279 | Ala-278, Ser-280, Asp-382, Arg-397, Gly-302 |
| Ciprofloxacin | -7.2 | Arg-200 | Halogen: Asp-19, Arg-200; Alkyl: Ala-21; Carbon hydrogen bond: Gly-198, Asp-17 | His-24, Ser-226, Thr-29, Arg-249, Thr-20, Gly-198 |

Table S-4. Molecular docking results of isolated compounds against *E*. *coli* DNA Gyrase B (PDB ID: 7P2M) and PqsA (PDB ID: 5OE4)

Table S-5. Molecular docking results of isolated compounds against Pyruvate kinase (PDB ID: 4G1N) and human topoisomerase *IIβ* (PDB ID: 3QX3)

| Target | Ligand | Binding affinity | H-bonding | Hydrophobic and Electrostatic | Vaan der Waals |
| --- | --- | --- | --- | --- | --- |
| 4G1N | **33** | -7.4 | - | - | Arg-376, 339, Leu-380, Lys-173, Pro-212, 302, 338, Glu-300, 304, 373, Ile-299, 301, Tyr-175, Ala-303, Met-377 |
| **34** | -7.5 | Tyr-390 | Pi-alkyl: Tyr-390 | Gln-393, 393, Arg-400, 400, 400, Thr-25, 25, Asp-24, 24, Glu-397, 396, 396, 396, Leu-392 |
| **35** | -7.1 | - | Alkyl: Pro-403, Met-22, Leu-392 | Leu-401, Ala-402, 21, Ile-404, Lys-422, Phe-421, 395, Arg-399, Glu-418 |
| **36** | -7.1 | Arg-106, 43 | - | Ser-67, Lys-66, Arg-383, 500, 376, Gly-68, His-464, 379, Asn-70, Phe-470, 502, Ala-42, Thr-41, Leu-380 |
| **37** | -6.9 | Glu-198 | Alkyl: Pro-212, Arg-339, Tyr-175;Pi-sigma: Tyr-175 | Ile-299, Gly-298, Ala-303, Pro-302,338, Glu-304, 373, Leu-380, Met-377, Lys-136, 173, Asn-199, Ser-182 |
| **38** | -7.1 | Glu-418, Arg-399 | Alkyl: Met-22 | Asp-24, Leu-401, 392, Arg-400, 447, Phe-421, 395, Lys-422, Ile-404, Ala-402, Pro-403 |
| **39** | -9.9 | Tyr-390, Lys-311, Asp-354, Ala-388 | Pi-sigma: Leu-353; Pi-pi T-shaped: Phe-26; Alkyl-353 | Ile-389, His-29, Leu-33, Met-30 |
| PKM2-IN-1 | -9.5 | Tyr-390 | Pi-pi T-shaped: Phe-26; Alkyl and Pi-alkyl: Leu-353, Phe-26 | Asp-354, Lys-311, Tyr-390, His-29, Ala-388, Ile-389, Asp-354, Met-30, Ala-388, His-29, Ile-389, Tyr-390 |
| 3QX3 | **33** | -8.8 | Asp-847 | Pi-sigma: Phe-1019 | Met-1022, Gly-1023, Ser-733, Glu-855, 728, 853, Arg-743, Pro-740, Val-852, Lys-744, Tyr-846, Leu-845 |
| **34** | -8.4 | His- 775 | Pi-sigma:Phe-1019; Alkyl and Pi-alkyl: Leu-394, 353, Phe-26 | Glu-397, Gln-393, Ile-389, Met-30, Leu-353, Lys-311, Asn-350, |
| **35** | -7.9 | - | Alkyl and Pi-alkyl: Glu-853, Leu-845, Arg-743 | Glu-855, 728, Trp-856, His-1021, Asp-1020, Ser-733, Phe-1019, Lys-744, Tyr-773, Ala-772 |
| **36** | -8.2 | Gln-1197, Ser-827, Glu-1198 | Alkyl: Pro-802 | Asn-790, 798, Gly-804, 807, Phe-806, 791, Thr-808, 980, 828, Gln-805, 801, Asp-979, Ala-637, Lys-638, 1193, Leu-829, 826, Val-1194 |
| **37** | -7.6 | Leu-829, Ser-827, Thr-828, Asn-890 | Alkyl: Ile-803, Val-1194; Carbon hydrogen bond: Pro-802 | Asp-1201, Asn-798, Gln-801, 1197, Glu-1198, Gly-804 |
| **38** | -7.7 | Thr-828, Ser-827, Asn-798 | Alkyl: Ile-803, Val-1194 | Asp-1201, Asn-790, Gln-801, 1197, Leu-829, Pro-802, Glu-1198, Gly-804 |
| **39** | -8.3 | Gln-850, His-774, Lys-759, Gly-765 | Carbon hydrogen bond and Pi-anion: Glu-769;Pi-Pi T-shaped and Amide Pi-stacked: Ala-768, Phe-823 | Val-758, Gln-762 |
| Etoposide | -9.7 | Arg-494, Gln-949, Lys-952, His-811 | Carbon hydrogen bond: Val-486, Asp-815; Alkyl and Pi-Alkyl:Val-491, Leu-484 | Gly-490, Thr-808, Ser-487, 483, Lys-638, 482, Gln-805, Ala-817, Leu-810 |
